# Supplementary material
Source: Springer Nature journal article supplement (https://www.springermedizin.de/resource/supplementary/12879_2009_1108_MOESM2_ESM.pdf/9441868)

**WAVE 1****WAVE 2**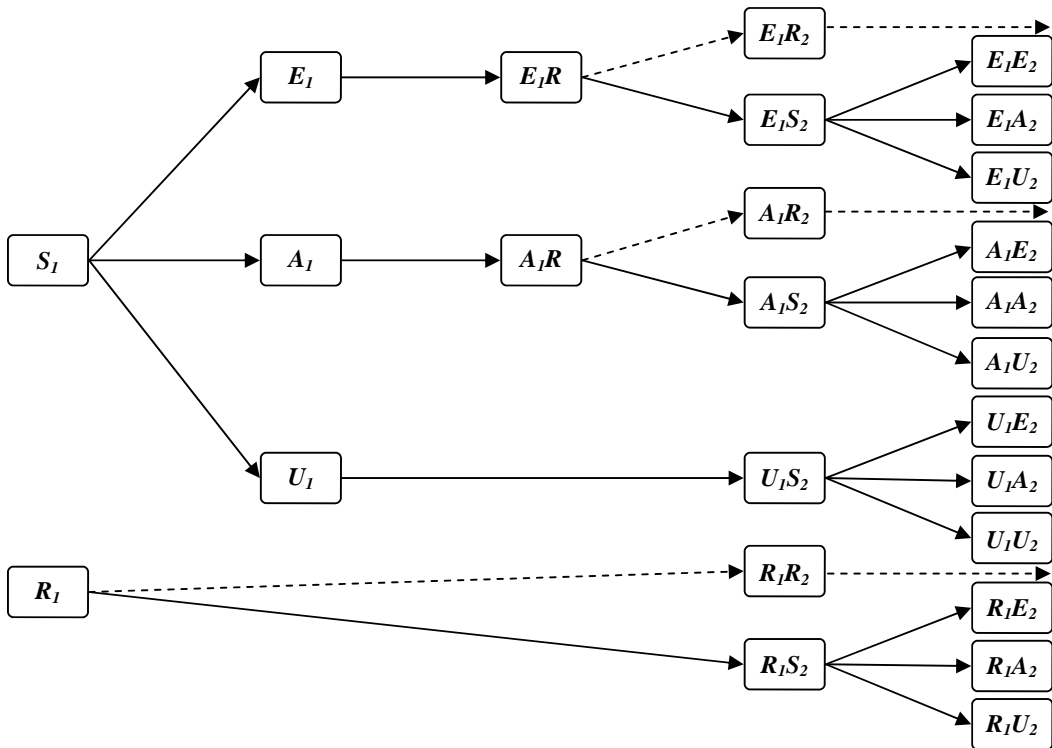

Supplement: MOESM2 [file 9441868]
